# Supplementary material for: Evaluation of a New Bulk Packaging Container for the Ripening of Feta Cheese
Source: MDPI journal article supplement (doi:10.3390/foods12112176), 2023-05-28
Supplement: s1 [file s1]

## Supplementary Material

### **Evaluation of a New Bulk Packaging Container for the Ripening of Feta Cheese**

Panagiotis Thodis<sup>1</sup>, Ioanna S. Kosma<sup>1</sup>, Konstantinos Nesseris<sup>2</sup>, Anastasia V. Badeka<sup>1\*</sup>, Michael G. Kontominas<sup>1\*</sup>

1 Laboratory of Food Chemistry, Department of Chemistry, University of Ioannina, 45110, Ioannina, Greece.

2 DODONI S.A. Agricultural Dairy Industry of Epirus, 1 Tagmatarchi Kostaki, Eleousa 45500, Ioannina, Greece.

\* Correspondence: [mkontomi@uoi.gr](mailto:mkontomi@uoi.gr); [abadeka@uoi.gr](mailto:abadeka@uoi.gr)

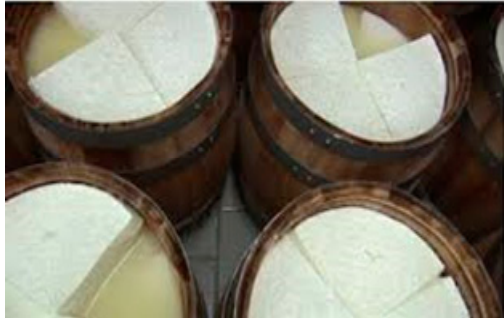

(a)

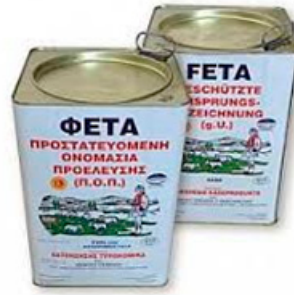

(b)

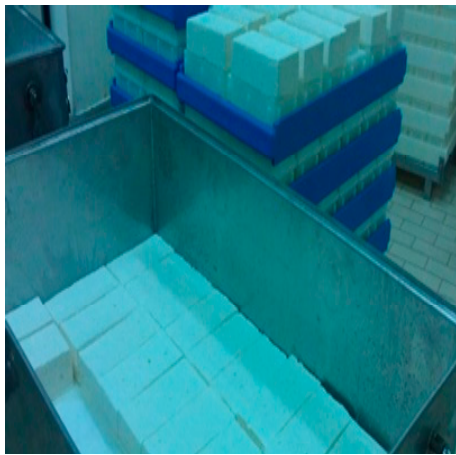

(c)

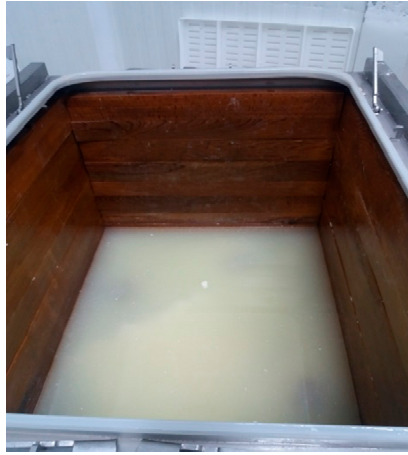

(d)

**Figure S1:** (a) wooden barrel, (b) tin can, (c) stainless steel tank and (d) stainless steel tank lined with wood for the ripening/bulk packaging of feta cheese.
